# Supplementary material
Source: publisher site journal article supplement (https://static.cambridge.org/content/id/urn:cambridge.org:id:article:S0266466620000134/resource/name/S0266466620000134supp001.pdf)
Supplement: Supplementary file 1 [file S0266466620000134supp001.pdf]

# Online supplement to "Count and duration time series with equal conditional stochastic and mean orders"

Abdelhakim Aknouche and Christian Francq

## Finite-sample properties of the EQMLE

Finite-sample behavior of EQMLE is examined through a simulation study. We consider three models satisfying the stochastic-equal-mean order property (cf. (1.5) in Aknouche and Francq, 2020, henceforth AF), namely the exponential conditional distribution with mean  $\lambda_t$  ( $Y_t/\mathcal{F}_{t-1} \sim \Gamma(1, 1/\lambda_t)$ ), the quadratic Gamma distribution,  $\Gamma(0.5, 0.5/\lambda_t)$ , and the linear Gamma distribution  $\Gamma(\lambda_t/2, 1/2)$ . For each model, we generate  $N = 1000$  replications with sample-sizes  $n = 500$ ,  $n = 1000$  and  $n = 3000$ . The conditional mean is generated from a linear POLI model (cf. AF, (1.1)) with  $p = q = 1$  and true parameter  $\theta_0 = (1, 0.6, 0.2)^\top$ . EQMLE and PQMLE are computed for each model. The means of EQML and PQML estimates over the 1000 replications are reported in bold, in Table 1 for model  $\Gamma(1, 1/\lambda_t)$ , in Table 2 for model  $\Gamma(0.5, 0.5/\lambda_t)$ , and in Table 3 for model  $\Gamma(0.5\lambda_t, 0.5)$ . These tables also show four estimates of the mean square error  $E(\hat{\theta} - \theta_0)^2$  (see also Ahmad and Francq, 2016). These estimates are i) the estimated standard error (ESE) given by  $ESE(\theta_{0j}) = \frac{1}{N} \sum_{i=1}^N (\hat{\theta}_j^{(i)} - \theta_{0j})^2$  ( $\hat{\theta}_j^{(i)}$  being the estimate of  $\theta_{0j}$  at the  $i$ th replication,  $j = 1, 2, 3$ ), ii) the asymptotic standard error (ASE) defined by  $ASE(\theta_{0j}) = \frac{1}{N} \sum_{i=1}^N \sqrt{\frac{1}{n} (\hat{\Sigma}^{(i)})^{-1}(j, j)}$ , iii) the theoretical standard error (TSE) given by  $TSE(\theta_{0j}) = \frac{1}{N} \sum_{i=1}^N \sqrt{\frac{1}{n} (\Sigma^{(i)})^{-1}(j, j)}$ , where  $\Sigma$  is computed from a very large series (with sample size  $n = 20000$ ), and finally iv) the eXponential standard error (XSE) computed similarly to ASE while replacing  $\hat{\Sigma}^{(i)}$  by  $\hat{\mathbf{J}}^{(i)}$ .

The same measures are considered for PQMLE but are rather based on the asymptotic results given by (4.6) in AF. In particular, XSE is replaced by the Poisson standard error (PSE) computed from (4.7) in AF with  $b = 1$  (see also Ahmad and Francq, 2016).

|      |              | $\Gamma(1, 1/\lambda_t)$ |               |               |       |               |               |               |            |           |
|------|--------------|--------------------------|---------------|---------------|-------|---------------|---------------|---------------|------------|-----------|
|      |              | $\omega_0$               | $\alpha_0$    | $\beta_0$     |       |               |               | $\omega_0$    | $\alpha_0$ | $\beta_0$ |
| $n$  | $\theta_0$   | 1                        | 0.6           | 0.2           |       | 1             | 0.6           | 0.2           |            |           |
| 500  | <b>EQMLE</b> | <b>1.1286</b>            | <b>0.5918</b> | <b>0.1743</b> | PQMLE | <b>1.1450</b> | <b>0.5698</b> | <b>0.1867</b> |            |           |
|      | ESE          | 0.3059                   | 0.0728        | 0.0772        | ESE   | 0.3034        | 0.0923        | 0.0913        |            |           |
|      | ASE          | 0.1945                   | 0.0699        | 0.0675        | ASE   | 0.2500        | 0.0932        | 0.0828        |            |           |
|      | TSE          | 0.1819                   | 0.0706        | 0.0672        | TSE   | 0.2752        | 0.1076        | 0.0996        |            |           |
|      | XSE          | 0.1955                   | 0.0703        | 0.0663        | PSE   | 0.1072        | 0.0251        | 0.0310        |            |           |
| 1000 | <b>EQMLE</b> | <b>1.0641</b>            | <b>0.5971</b> | <b>0.1860</b> | PQMLE | <b>1.0841</b> | <b>0.5827</b> | <b>0.1899</b> |            |           |
|      | ESE          | 0.1694                   | 0.0495        | 0.0494        | ESE   | 0.1961        | 0.0707        | 0.0658        |            |           |
|      | ASE          | 0.1318                   | 0.0496        | 0.0464        | ASE   | 0.1837        | 0.0727        | 0.0618        |            |           |
|      | TSE          | 0.1286                   | 0.0499        | 0.0475        | TSE   | 0.1946        | 0.0761        | 0.0704        |            |           |
|      | XSE          | 0.1332                   | 0.0498        | 0.0463        | PSE   | 0.0723        | 0.0177        | 0.0210        |            |           |
| 3000 | <b>EQMLE</b> | <b>1.0247</b>            | <b>0.6001</b> | <b>0.1945</b> | PQMLE | <b>1.0368</b> | <b>0.5916</b> | <b>0.1960</b> |            |           |
|      | ESE          | 0.0857                   | 0.0305        | 0.0285        | ESE   | 0.1215        | 0.0430        | 0.0425        |            |           |
|      | ASE          | 0.0750                   | 0.0287        | 0.0266        | ASE   | 0.1153        | 0.0462        | 0.0389        |            |           |
|      | TSE          | 0.0743                   | 0.0288        | 0.0274        | TSE   | 0.1124        | 0.0439        | 0.0407        |            |           |
|      | XSE          | 0.0749                   | 0.0288        | 0.0265        | PSE   | 0.0400        | 0.0101        | 0.0116        |            |           |

Table 1. Estimation results for EQMLE and PQMLE for model  $\Gamma(1, 1/\lambda_t)$ .

|      |            | $\Gamma(0.5, 0.5/\lambda_t)$ |               |               |       |  |  |               |               |               |
|------|------------|------------------------------|---------------|---------------|-------|--|--|---------------|---------------|---------------|
|      |            | $\omega_0$                   | $\alpha_0$    | $\beta_0$     |       |  |  | $\omega_0$    | $\alpha_0$    | $\beta_0$     |
| $n$  | $\theta_0$ | 1                            | 0.6           | 0.2           |       |  |  | 1             | 0.6           | 0.2           |
| 500  | EQMLE      | <b>1.0710</b>                | <b>0.5968</b> | <b>0.1836</b> | PQMLE |  |  | <b>1.2129</b> | <b>0.5960</b> | <b>0.1597</b> |
|      | ESE        | 0.2457                       | 0.0943        | 0.0789        | ESE   |  |  | 0.3268        | 0.0535        | 0.0826        |
|      | ASE        | 0.1960                       | 0.0950        | 0.0723        | ASE   |  |  | 0.2236        | 0.0539        | 0.0691        |
|      | TSE        | 0.1954                       | 0.0946        | 0.0738        | TSE   |  |  | 0.2047        | 0.0553        | 0.0670        |
|      | XSE        | 0.1412                       | 0.0681        | 0.0518        | PSE   |  |  | 0.2157        | 0.0467        | 0.0648        |
| 1000 | EQMLE      | <b>1.0409</b>                | <b>0.5970</b> | <b>0.1890</b> | PQMLE |  |  | <b>1.0979</b> | <b>0.5973</b> | <b>0.1827</b> |
|      | ESE        | 0.1596                       | 0.0704        | 0.0552        | ESE   |  |  | 0.1882        | 0.0389        | 0.0517        |
|      | ASE        | 0.1365                       | 0.0678        | 0.0514        | ASE   |  |  | 0.1524        | 0.0388        | 0.0481        |
|      | TSE        | 0.1382                       | 0.0669        | 0.0522        | TSE   |  |  | 0.1447        | 0.0391        | 0.0474        |
|      | XSE        | 0.0980                       | 0.0482        | 0.0367        | PSE   |  |  | 0.1437        | 0.0328        | 0.0444        |
| 3000 | EQMLE      | <b>1.0182</b>                | <b>0.6006</b> | <b>0.1950</b> | PQMLE |  |  | <b>1.0326</b> | <b>0.6004</b> | <b>0.1930</b> |
|      | ESE        | 0.0852                       | 0.0383        | 0.0306        | ESE   |  |  | 0.0940        | 0.0231        | 0.0285        |
|      | ASE        | 0.0783                       | 0.0394        | 0.0296        | ASE   |  |  | 0.0865        | 0.0227        | 0.0276        |
|      | TSE        | 0.0798                       | 0.0386        | 0.0301        | TSE   |  |  | 0.0836        | 0.0226        | 0.0274        |
|      | XSE        | 0.0557                       | 0.0279        | 0.0211        | PSE   |  |  | 0.0799        | 0.0189        | 0.0251        |

Table 2. Estimation results for EQMLE and PQMLE for model  $\Gamma(0.5, 0.5/\lambda_t)$ .

|      |            | $\Gamma(0.5\lambda_t, 0.5)$ |               |               |       |               |               |               |            |           |
|------|------------|-----------------------------|---------------|---------------|-------|---------------|---------------|---------------|------------|-----------|
|      |            | $\omega_0$                  | $\alpha_0$    | $\beta_0$     |       |               |               | $\omega_0$    | $\alpha_0$ | $\beta_0$ |
| $n$  | $\theta_0$ | 1                           | 0.6           | 0.2           |       |               |               | 1             | 0.6        | 0.2       |
| 500  | EQMLE      | <b>1.2100</b>               | <b>0.6158</b> | <b>0.1395</b> | PQMLE | <b>1.1290</b> | <b>0.6018</b> | <b>0.1719</b> |            |           |
|      | ESE        | 0.3543                      | 0.0603        | 0.1042        | ESE   | 0.2601        | 0.0529        | 0.0783        |            |           |
|      | ASE        | 0.2324                      | 0.0582        | 0.0775        | ASE   | 0.2049        | 0.0504        | 0.0684        |            |           |
|      | TSE        | 0.2093                      | 0.0597        | 0.0759        | TSE   | 0.1909        | 0.0516        | 0.0677        |            |           |
|      | XSE        | 0.2796                      | 0.0840        | 0.1038        | PSE   | 0.1474        | 0.0362        | 0.0490        |            |           |
| 1000 | EQMLE      | <b>1.1286</b>               | <b>0.6112</b> | <b>0.1620</b> | PQMLE | <b>1.0565</b> | <b>0.6019</b> | <b>0.1868</b> |            |           |
|      | ESE        | 0.2265                      | 0.0426        | 0.0680        | ESE   | 0.1547        | 0.0367        | 0.0500        |            |           |
|      | ASE        | 0.1615                      | 0.0414        | 0.0548        | ASE   | 0.1401        | 0.0358        | 0.0477        |            |           |
|      | TSE        | 0.1480                      | 0.0422        | 0.0537        | TSE   | 0.1350        | 0.0365        | 0.0479        |            |           |
|      | XSE        | 0.1891                      | 0.0594        | 0.0728        | PSE   | 0.0999        | 0.0255        | 0.0340        |            |           |
| 3000 | EQMLE      | <b>1.0433</b>               | <b>0.6040</b> | <b>0.1856</b> | PQMLE | <b>1.0231</b> | <b>0.5992</b> | <b>0.1964</b> |            |           |
|      | ESE        | 0.1044                      | 0.0241        | 0.0351        | ESE   | 0.0852        | 0.0208        | 0.0279        |            |           |
|      | ASE        | 0.0905                      | 0.0240        | 0.0312        | ASE   | 0.0800        | 0.0207        | 0.0274        |            |           |
|      | TSE        | 0.0855                      | 0.0244        | 0.0310        | TSE   | 0.0779        | 0.0211        | 0.0277        |            |           |
|      | XSE        | 0.1033                      | 0.0341        | 0.0414        | PSE   | 0.0567        | 0.0147        | 0.0195        |            |           |

Table 3. Estimation results for EQMLE and PQMLE for model  $\Gamma(0.5\lambda_t, 0.5)$ .

From the latter simulations some broad conclusions may be drawn. Firstly, the parameters are well estimated by the two methods regarding their small bias and their various estimated standard errors. The latter are quite close to each other implying a good reliability of the estimates. Secondly, the estimation results are consistent with asymptotic theory as their accuracies increase with the sample size. Thirdly, as expected, the EQMLE gives better results under the conditional exponential distribution but is less accurate than the PQMLE if we depart from the exponential distribution. Note finally that EQMLE largely outperforms PQMLE under the conditional exponential model but its superiority is less pronounced

in the Gamma  $\Gamma(0.5, 0.5/\lambda_t)$  case. However, PQMLE dominates EQMLE for the Gamma  $\Gamma(0.5\lambda_t, 0.5)$  model with linear conditional variance, which is in accordance with Remark 4.3 in AF. The estimation methods were implemented in Matlab on a desktop with Intel Core i7. The optimization routines were developed using the `fminunc` function of Matlab.

## References

- [1] Ahmad, A. and Francq, C. (2016) Poisson QMLE of count time series models. *Journal of Time Series Analysis* 37, 291–314.
- [2] Aknouche, A. and Francq, C. (2020). Count and duration time series with equal conditional stochastic and mean orders. To appear in *Econometric Theory*.
